# Supplementary material for: The Impact of Migration on Farm Performance: Evidence from Rice Farmers in China
Source: MDPI journal article supplement (doi:10.3390/agriculture13030708), 2023-03-18
Supplement: s1 [file s1]

## ***Supplementary Material***

Table S1 Definition of variables in estimating propensity score

| Variables                                        | Definition                                                                                                                          |
|--------------------------------------------------|-------------------------------------------------------------------------------------------------------------------------------------|
| Migration                                        | =1 if the household has at least one member living outside the county for at least six months for employment purposes; =0 otherwise |
| Land certificate                                 | =1 if the village issues land certificates to households in the 1998 land contracting; =0 otherwise                                 |
| Land reallocation                                | =1 if the village reallocated land at least once after the 1998 land contracting; =0 otherwise                                      |
| Household head age                               | Age of household head                                                                                                               |
| Household head education level                   | Education level of household head                                                                                                   |
| Average age of adults                            | Average age of adults (aged 16 years old and above, and excluding those who are still students)                                     |
| Average education level of adults                | Ratio of adults having taken junior high school or higher to all adults in the household                                            |
| Average off-farm employment experience of adults | Ratio of adults with off-farm experience in the year before last to all adults in the household                                     |
| Household size                                   | Number of household members                                                                                                         |
| Female ratio                                     | Ratio of female adults                                                                                                              |
| Number of adults                                 | Number of household members aged 16 years old and above                                                                             |
| Dependency ratio                                 | The number of family members aged over 65 or below 16 divided by family size                                                        |
| Village official                                 | Household head is or was a village official                                                                                         |
| Land area per capita                             | Area of contracted land per capita (mu)                                                                                             |
| Number of land plots                             | Number of contracted land plots                                                                                                     |
| Possession of houses                             | The number of houses the household owns in the year before last                                                                     |
| Possession of machinery                          | =1 if the household possesses machinery the year before last; =0 otherwise                                                          |
| Distance to town centre                          | Distance to township centre (km)                                                                                                    |

---

|           |                                                     |
|-----------|-----------------------------------------------------|
| Jiangsu   | =1 if the household is from Jiangsu; =0 otherwise   |
| Liaoning  | =1 if the household is from Liaoning; =0 otherwise  |
| Chongqing | =1 if the household if from Chongqing; =0 otherwise |

---

Table S2 Descriptive statistics of variables in the production function

| Variable             | Unit                                                        | Mean    | S.D.     | Min. | Max.   |
|----------------------|-------------------------------------------------------------|---------|----------|------|--------|
| Yield                | Kg/household                                                | 4111.28 | 6993.148 | 135  | 56000  |
| Fertilizer           | Kg/household                                                | 230.64  | 394.1123 | 3.68 | 3072.8 |
| Land                 | Ha/household                                                | 0.55    | 0.9      | 0.02 | 7.47   |
| Machine              | Yuan <sup>1</sup> /household                                | 685.73  | 1478.8   | 0    | 16855  |
| Labour               | Labour days/household                                       | 39.29   | 128.31   | 0.33 | 3120   |
| Pesticide            | Yuan <sup>1</sup> /household                                | 758.23  | 1511.4   | 0    | 22400  |
| Soil quality         | From 1 (= low quality) to 5 (= high quality)                | 3.26    | 0.92     | 1    | 5      |
| Irrigation condition | From 1 (= low quality) to 5 (= high quality)                | 3.22    | 1.12     | 1    | 5      |
| Double-season rice   | =1 if a household produces double-season rice; =0 otherwise | 0.28    | 0.45     | 0    | 1      |

Note: <sup>1</sup>. 1 US dollar is about 6.69 yuan according to the exchange rate in August 2016.

Table S3 Descriptive statistics and comparison of variables for estimating participation in migration

| Variables                                        | Control     | Treatment   | Difference <sup>1</sup> | Mean <sup>2</sup> | Std. Dev. <sup>2</sup> | Min <sup>2</sup> | Max <sup>2</sup> |
|--------------------------------------------------|-------------|-------------|-------------------------|-------------------|------------------------|------------------|------------------|
|                                                  | Migration=0 | Migration=1 |                         |                   |                        |                  |                  |
| Migration                                        | --          | --          | --                      | 0.43              | 0.50                   | 0                | 1                |
| Land certificate                                 | 0.65        | 0.68        | -0.03                   | 0.66              | 0.47                   | 0                | 1                |
| Land reallocation                                | 0.45        | 0.36        | 0.09**                  | 0.41              | 0.49                   | 0                | 1                |
| Household head age                               | 56.15       | 57.79       | -1.64**                 | 56.85             | 9.45                   | 23               | 83               |
| Household head education level                   | 2.66        | 2.59        | 0.07                    | 2.63              | 0.99                   | 1                | 6                |
| Average age of adults                            | 51.01       | 46.19       | 4.82***                 | 48.95             | 8.71                   | 29.33            | 74.33            |
| Average education level of adults                | 0.54        | 0.61        | -0.07***                | 0.57              | 0.33                   | 0                | 1                |
| Average off-farm employment experience of adults | 0.54        | 0.66        | -0.13***                | 0.59              | 0.31                   | 0                | 1                |
| Household size                                   | 3.83        | 4.89        | -1.06***                | 4.29              | 1.74                   | 1                | 15               |
| Female ratio                                     | 0.49        | 0.48        | 0.01                    | 0.49              | 0.12                   | 0                | 1                |
| Number of adults                                 | 2.98        | 3.87        | -0.88***                | 3.36              | 1.16                   | 1                | 9                |
| Dependency ratio                                 | 0.22        | 0.24        | -0.02                   | 0.23              | 0.19                   | 0                | 0.75             |
| Village official                                 | 0.26        | 0.25        | 0.01                    | 0.26              | 0.44                   | 0                | 1                |
| Land area per capita                             | 2.28        | 1.22        | 1.06***                 | 1.83              | 2.63                   | 0                | 35               |
| Number of land plots                             | 8.36        | 8.22        | 0.13                    | 8.32              | 7.22                   | 0                | 45               |
| Possession of houses                             | 1.19        | 1.16        | 0.03                    | 1.18              | 0.44                   | 0                | 4                |
| Possession of machinery                          | 0.34        | 0.25        | 0.09**                  | 0.30              | 0.46                   | 0                | 1                |
| Distance to town centre                          | 5.11        | 5.67        | -0.56*                  | 5.36              | 4.19                   | 0                | 26               |

|           |      |      |         |      |      |   |   |
|-----------|------|------|---------|------|------|---|---|
| Jiangsu   | 0.21 | 0.22 | -0.01   | 0.21 | 0.41 | 0 | 1 |
| Liaoning  | 0.09 | 0.07 | 0.03    | 0.08 | 0.27 | 0 | 1 |
| Chongqing | 0.24 | 0.32 | -0.07** | 0.27 | 0.45 | 0 | 1 |

Note: <sup>1</sup> Differences are tested by a two-sided unpaired t-test of means or proportion. <sup>2</sup> Values of mean, “std. dev.”, min and max apply to the full sample.

\*\*\* Significant at the 1% level; \*\* Significant at the 5% level; \* Significant at the 10% level (hereafter the same).

Table S4 Estimated results of the production function

| Variables                        | Coef.   | z     |
|----------------------------------|---------|-------|
| ln(Fertilizer)                   | 0.13    | 0.71  |
| ln(Land)                         | 1.31*** | 4.74  |
| ln(Pesticide)                    | -0.11   | -1.29 |
| Zero pesticide <sup>1</sup>      | -0.03   | -0.25 |
| ln(Machinery)                    | -0.04   | -0.94 |
| Zero machinery <sup>1</sup>      | 0.004   | 0.06  |
| ln(Labour)                       | -0.14   | -1.63 |
| 0.5(ln(Fertilizer)) <sup>2</sup> | -0.03   | -1.28 |
| 0.5(ln(Land)) <sup>2</sup>       | 0.11*   | 1.84  |
| 0.5(ln(Pesticide)) <sup>2</sup>  | 0.0005  | 0.05  |
| 0.5(ln(Machinery)) <sup>2</sup>  | 0.002   | 0.33  |
| 0.5(ln(Labour)) <sup>2</sup>     | 0.01*   | 1.69  |
| ln(Fertilizer)× ln(Land)         | 0.01    | 0.31  |
| ln(Fertilizer)× ln(Pesticide)    | 0.01    | 1.01  |
| ln(Fertilizer)× ln(Machinery)    | 0.001   | 0.2   |
| ln(Fertilizer)× ln(Labour)       | 0.01    | 0.34  |
| ln(Land)× ln(Pesticide)          | -0.03** | -2.26 |
| ln(Land)× ln(Machinery)          | -0.01   | -0.72 |
| ln(Land)× ln(Labour)             | -0.03*  | -1.72 |
| ln(Pesticide)× ln(Machinery)     | 0.004*  | 1.65  |
| ln(Pesticide)× ln(Labour)        | 0.01    | 0.95  |
| ln(Machine)× ln(Labour)          | 0.003   | 0.71  |
| Soil quality                     | 0.02**  | 2.04  |
| Irrigation condition             | 0.01**  | 2.17  |
| Double-season rice               | -0.02   | -0.6  |
| Jiangsu                          | 0.24*** | 7.21  |
| Liaoning                         | 0.20*** | 4.77  |
| Chongqing                        | 0.10*** | 3.62  |
| Constant                         | 9.14*** | 13.43 |
| Sample size                      | 809     |       |

---

|                |             |
|----------------|-------------|
| Log likelihood | 329.32      |
| Wald Chi2(28)  | 30569.42*** |

---

Note: <sup>1</sup>. Following the technique proposed by Battese (1997), the dummy variables for zero values of pesticide and machine were added to correct for zero values of inputs in an unbiased way.

We clustered standard errors at the village level.

Table S5 Output elasticities with respect to each input at sample means<sup>1</sup>

|                  | Elasticity |
|------------------|------------|
| Fertilizer       | 0.029      |
| Land             | 0.95       |
| Pesticide        | -0.082     |
| Machine          | 0.047      |
| Labour           | -0.001     |
| Scale elasticity | 0.95       |

Note: <sup>1</sup>. To better understand the results of production function, we present the output elasticities of the other inputs and scale elasticity. The output elasticity with respect to fertilizer is calculated according to Eq. (9). The output elasticities with respect to other inputs ( $\tau_{ij}$ ) is calculated with  $\tau_{ij} = \beta_j + \sum_k \beta_{jk} \ln X_{ik} + \beta_{jf} \ln F_i + \beta_{jj} \ln X_{ij}$ . The scale elasticity ( $L_i$ ) is calculated with  $L_i = \tau_i + \sum_j \tau_{ij}$ .



Table S6 Influencing factors of migration

| Variables                                        | Coef.    | Z       |
|--------------------------------------------------|----------|---------|
| Land certificate                                 | -0.24    | -0.93   |
| Land reallocation                                | -0.28    | -1.05   |
| Household head age                               | 0.04***  | 3.46    |
| Household head education level                   | -0.02    | -0.19   |
| Average age of adults                            | -0.09*** | -5.00   |
| Average education level of adults                | 0.01     | 0.03    |
| Average off-farm employment experience of adults | 0.87***  | 2.60    |
| Household size                                   | -0.32**  | -2.43   |
| Female ratio                                     | 0.21     | 0.32    |
| Number of adults                                 | 0.90***  | 5.03    |
| Dependency ratio                                 | 0.56     | 0.99    |
| Village official                                 | -0.15    | -0.71   |
| Land area per capita                             | -0.16**  | -2.02   |
| Number of land plots                             | -0.005   | -0.32   |
| Possession of houses                             | -0.50**  | -2.15   |
| Possession of machinery                          | -0.32    | -1.59   |
| Distance to town centre                          | 0.04     | 1.31    |
| Jiangsu                                          | 0.13     | 0.46    |
| Liaoning                                         | 0.42     | 0.87    |
| Chongqing                                        | 0.49     | 1.52    |
| Constant                                         | -0.009   | -0.01   |
| Observations <sup>1</sup>                        |          | 746     |
| Log likelihood                                   |          | -403.53 |

Note: We cluster standard errors at the village level.

1. Deleting observations with missing information of migration and its influencing factors, the data of 746 households are used for propensity score matching.

Table S7 Descriptive statistics of treated and control groups after matching

| Variables                                        | Mean    |         | t <sup>1</sup> |
|--------------------------------------------------|---------|---------|----------------|
|                                                  | Treated | Control |                |
| Land certificate                                 | 0.68    | 0.70    | -0.38          |
| Land reallocation                                | 0.36    | 0.40    | -1.03          |
| Household head age                               | 57.65   | 57.87   | -0.3           |
| Household head education level                   | 2.59    | 2.58    | 0.2            |
| Average age of adults                            | 46.28   | 46.13   | 0.27           |
| Average education level of adults                | 0.61    | 0.62    | -0.65          |
| Average off-farm employment experience of adults | 0.66    | 0.66    | 0.09           |
| Household size                                   | 4.87    | 4.96    | -0.73          |
| Female ratio                                     | 0.48    | 0.47    | 0.73           |
| Number of adults                                 | 3.83    | 3.89    | -0.68          |
| Dependency ratio                                 | 0.24    | 0.25    | -0.54          |
| Village official                                 | 0.25    | 0.25    | 0.09           |
| Land area per capita                             | 1.23    | 1.22    | 0.1            |
| Number of land plots                             | 8.19    | 7.88    | 0.55           |
| Possession of houses                             | 1.16    | 1.22    | -1.55          |
| Possession of machinery                          | 0.26    | 0.26    | -0.13          |
| Distance to town centre                          | 5.67    | 5.42    | 0.71           |
| Jiangsu                                          | 0.22    | 0.25    | -0.92          |
| Liaoning                                         | 0.07    | 0.08    | -0.58          |
| Chongqing                                        | 0.32    | 0.30    | 0.41           |

Note: <sup>1</sup>. A t-test is used to determine if the sample means are significantly different between treated and control groups. The results of the t-test show that none of the means are significantly different between treated and control groups.

Table S8 Number of treated and untreated households on/off support

|                                                 | Off support <sup>1</sup> | On support |
|-------------------------------------------------|--------------------------|------------|
| Treatment: migration                            |                          |            |
| Untreated                                       | 0                        | 427        |
| Treated                                         | 5                        | 314        |
| Treatment: less intensive migration, $\leq 0.5$ |                          |            |
| Untreated                                       | 0                        | 427        |
| Treated                                         | 1                        | 250        |
| Treatment: more intensive migration, $> 0.5$    |                          |            |
| Untreated                                       | 0                        | 427        |
| Treated                                         | 6                        | 62         |

Note: <sup>1</sup>. A treated household is on support if its propensity score is within the scope of propensity scores of all non-treated households; otherwise, it is off-support.

Table S9 Stochastic frontier analysis using the Cobb-Douglas production function

| Variables                  | Coef.    | Z     |
|----------------------------|----------|-------|
| ln(Fertilizer)             | 0.04**   | 2.19  |
| ln(Land)                   | 0.96***  | 39.91 |
| ln(Pesticide)              | 0.004    | 0.35  |
| Zero pesticide             | -0.06    | -1    |
| ln(Machinery)              | 0.01*    | 1.95  |
| Zero machinery             | 0.05     | 1.41  |
| ln(Labour)                 | -0.01    | -0.75 |
| Land quality               | 0.02*    | 1.83  |
| Irrigation condition       | 0.01**   | 2.24  |
| Double-season rice         | -0.02    | -0.86 |
| Jiangsu                    | 0.23***  | 7.56  |
| Liaoning                   | 0.22***  | 4.81  |
| Chongqing                  | 0.11***  | 3.74  |
| Constant                   | 8.49***  | 58.1  |
| Observation                | 809      |       |
| Log likelihood             | 312.29   |       |
| Wald Chi <sup>2</sup> (18) | 22635.10 |       |

Note: We clustered standard errors at the village level.

Table S10 Technical efficiency using the Cobb-Douglas production function

|                             | Technical efficiency | Fertilizer use efficiency |
|-----------------------------|----------------------|---------------------------|
| Mean <sup>1</sup>           | 0.92 (0.03)          | 0.14 (0.08)               |
| Minimum                     | 0.76                 | 0.001                     |
| 25 <sup>th</sup> percentile | 0.9                  | 0.08                      |
| 50 <sup>th</sup> percentile | 0.92                 | 0.14                      |
| 75 <sup>th</sup> percentile | 0.93                 | 0.18                      |
| Maximum                     | 0.97                 | 0.5                       |

Note: <sup>1</sup>. The standard deviations are in parentheses.

Table S11 The causal effect of migration and its intensity on technical efficiency and fertilizer use efficiency using radius matching

|                                                                            | Treated | Control | Difference <sup>1</sup> | S. E.  |
|----------------------------------------------------------------------------|---------|---------|-------------------------|--------|
| <i>Treatment: migration</i>                                                |         |         |                         |        |
| Technical efficiency                                                       | 0.9141  | 0.9182  | -0.0041***              | 0.0017 |
| Fertilizer use efficiency                                                  | 0.2113  | 0.2211  | -0.0098***              | 0.0041 |
| Observations                                                               | 314     | 427     |                         |        |
| <i>Treatment: less intensive migration, <math>\leq 0.5</math> migrants</i> |         |         |                         |        |
| Technical efficiency                                                       | 0.9144  | 0.9182  | -0.0038**               | 0.0019 |
| Fertilizer use efficiency                                                  | 0.2122  | 0.2211  | -0.0089**               | 0.0045 |
| Observations                                                               | 250     | 427     |                         |        |
| <i>Treatment: more intensive migration, <math>&gt; 0.5</math> migrants</i> |         |         |                         |        |
| Technical efficiency                                                       | 0.9128  | 0.9182  | -0.0054 <sup>†</sup>    | 0.0036 |
| Fertilizer use efficiency                                                  | 0.2076  | 0.2211  | -0.0135 <sup>†</sup>    | 0.0084 |
| Observations                                                               | 62      | 427     |                         |        |

Note: <sup>1</sup>. A t-test is used to identify the differences in outcomes between treatment households and their matching partners.

<sup>†</sup> Significant at the 15% level.

Table S12 The effect of migration on output and fertilizer use intensity (kg/ha)

|                             | Treated | Control | Difference <sup>1</sup> | S. E.  |
|-----------------------------|---------|---------|-------------------------|--------|
| <i>Treatment: migration</i> |         |         |                         |        |
| Land productivity           | 7266    | 7606    | -340.85***              | 144.46 |
| Fertilizer use intensity    | 408     | 413     | -5.43                   | 18.78  |
| Observations                | 314     | 427     |                         |        |

Note: 1. A t-test is used to identify the differences in outcomes between treatment households and their matching partners.

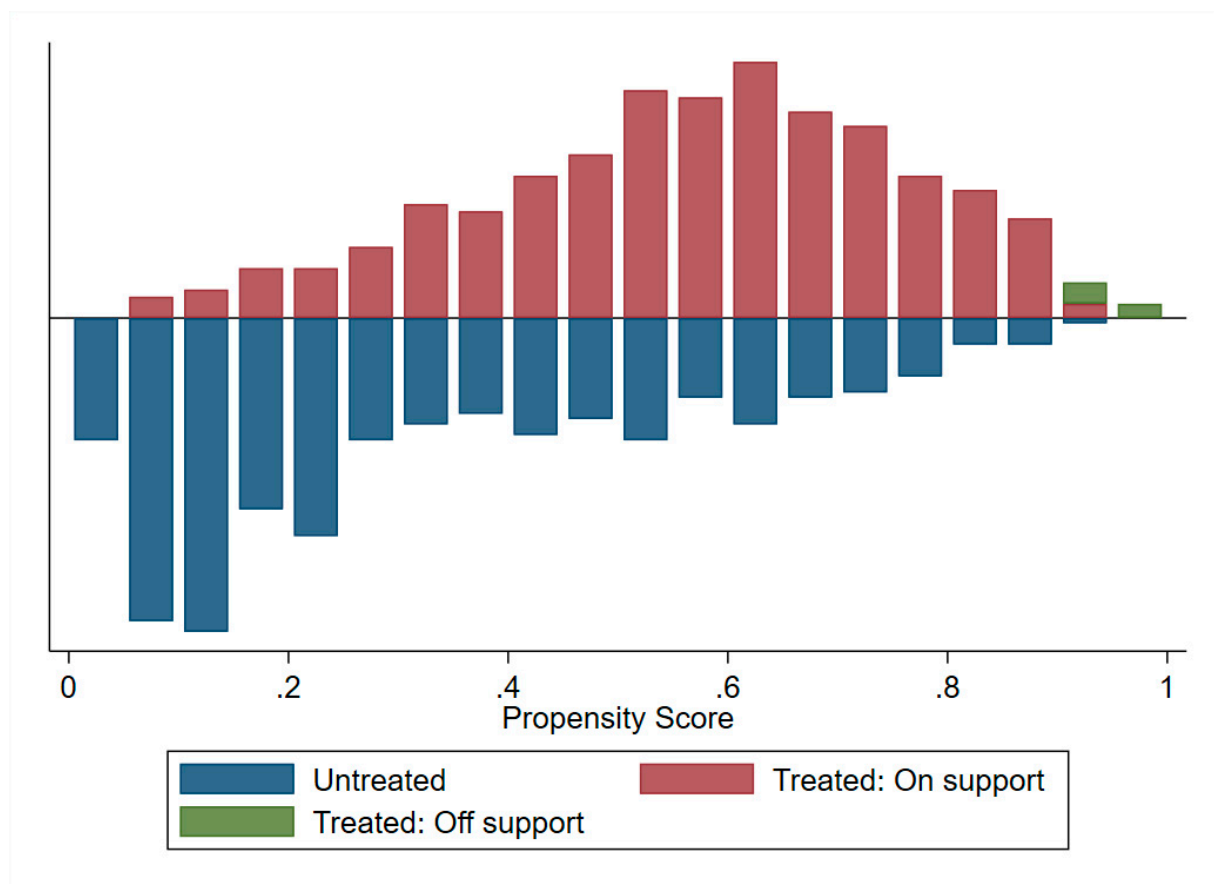

Figure S1 Distribution of pair-wise propensity score (treatment: migration)

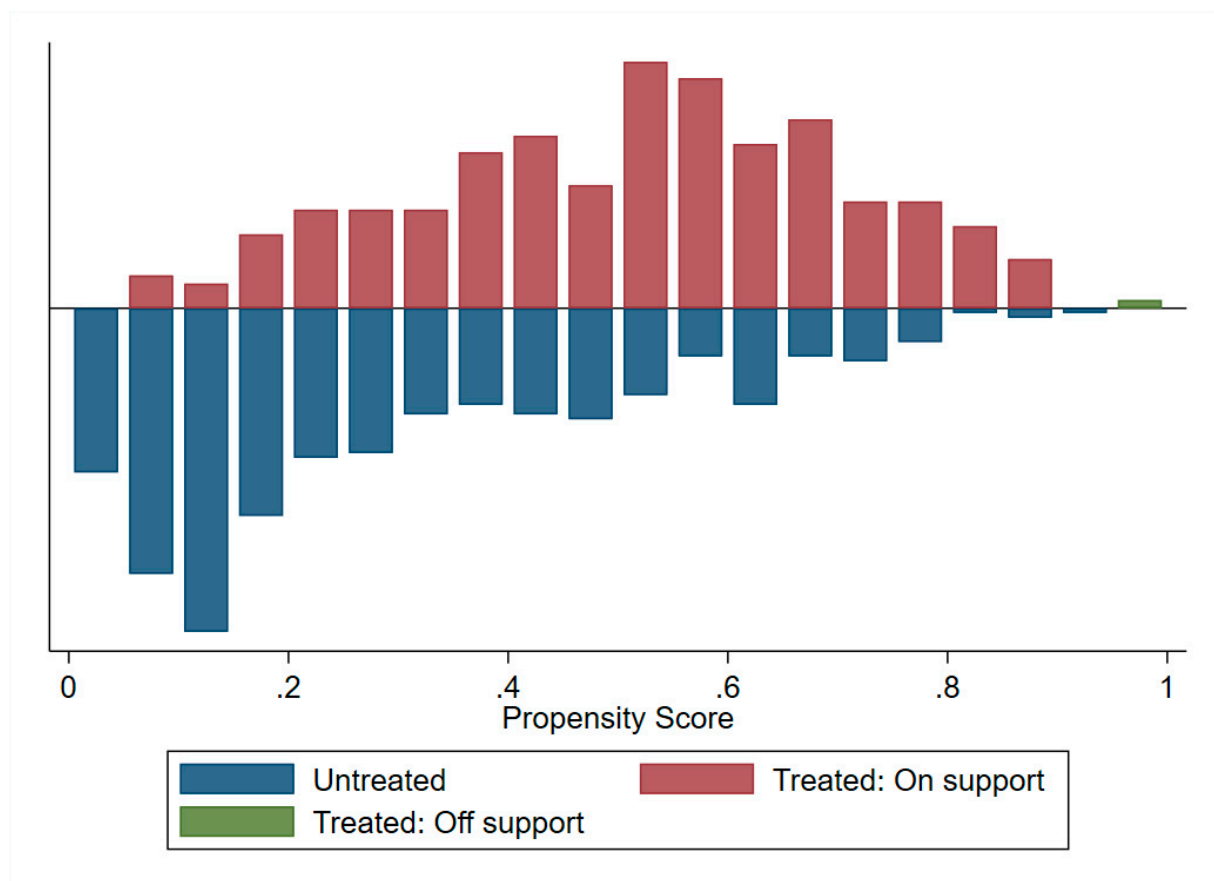



Figure S2 Distribution of pair-wise propensity score (treatment: less intensive migration)

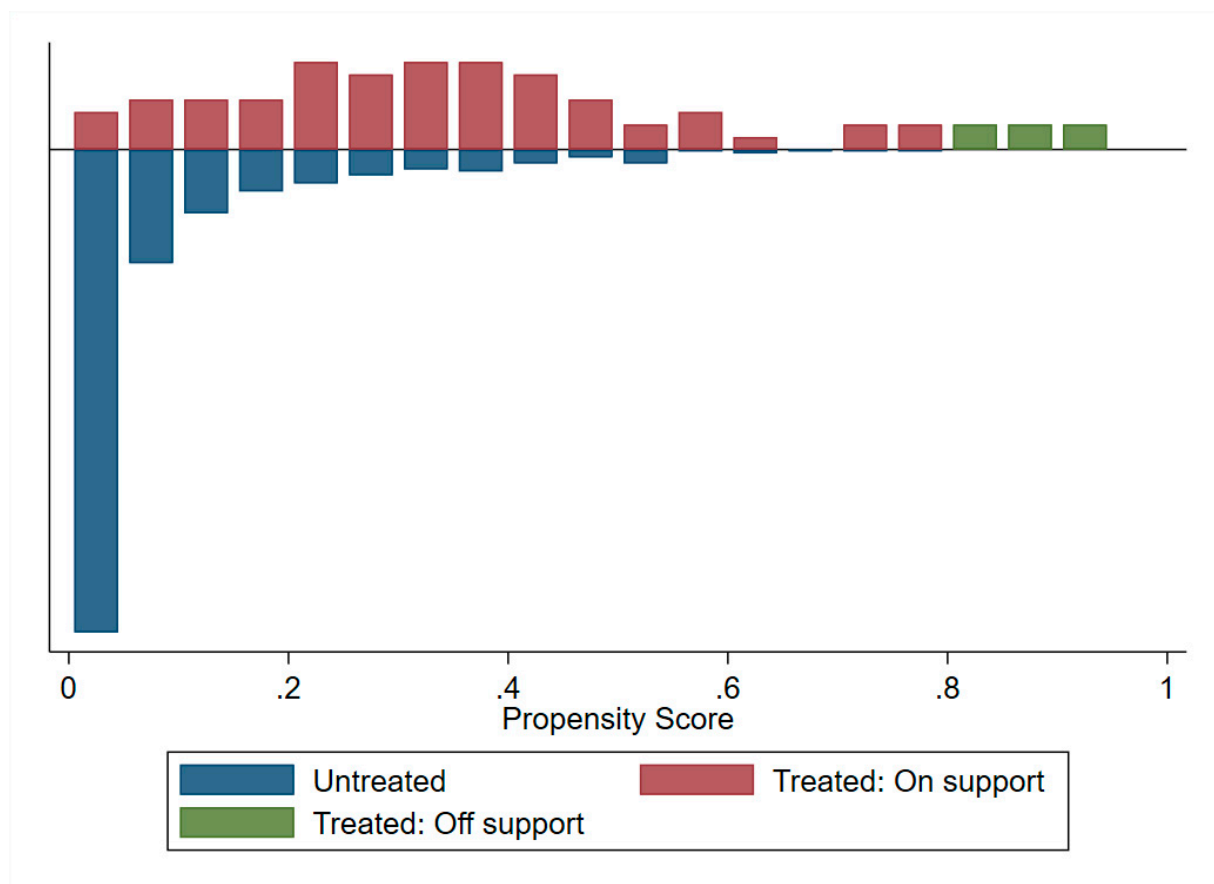

Figure S3 Distribution of pair-wise propensity score (treatment: more intensive migration)
