# Supplementary material for: The Impact of Migration on Farm Performance: Evidence from Rice Farmers in China
Source: MDPI journal article supplement (doi:10.3390/agriculture13030708), 2023-03-18
Supplement: s1 [file s1]

Archive with 1 entries (1 files):
- agriculture-2228650-supplementary.pdf
